# Supplementary material
Source: publisher site journal article supplement (https://www.spandidos-publications.com/775/downloadSupplementary)
Supplement: Supplementary file 1 [file downloadSupplementary]

Table SX. GO analysis for mRNAs in the hsa\_circ\_0006220-microRNA-mRNA axis.

| ID         | Description                                                                                                         | GeneRatio | P-value  |
|------------|---------------------------------------------------------------------------------------------------------------------|-----------|----------|
| GO:0001046 | Core promoter sequence-specific DNA binding                                                                         | 11/483    | 2.60E-05 |
| GO:0005200 | Structural constituent of cytoskeleton                                                                              | 12/483    | 3.82E-05 |
| GO:0019887 | Protein kinase regulator activity                                                                                   | 17/483    | 4.02E-05 |
| GO:0019207 | Kinase regulator activity                                                                                           | 18/483    | 4.49E-05 |
| GO:0000987 | Proximal promoter sequence-specific DNA binding                                                                     | 28/483    | 5.71E-05 |
| GO:0000978 | RNA polymerase II proximal promoter sequence-specific DNA binding                                                   | 27/483    | 8.07E-05 |
| GO:0001047 | Core promoter binding                                                                                               | 13/483    | 0.000153 |
| GO:0031490 | Chromatin DNA binding                                                                                               | 11/483    | 0.000191 |
| GO:0000982 | Transcription factor activity, RNA polymerase II proximal promoter sequence-specific DNA binding                    | 25/483    | 0.000225 |
| GO:0001227 | Transcriptional repressor activity, RNA polymerase II transcription regulatory region sequence-specific DNA binding | 17/483    | 0.00026  |
| GO:0017017 | MAP kinase tyrosine/serine/threonine phosphatase activity                                                           | 4/483     | 0.000333 |
| GO:0003727 | Single-stranded RNA binding                                                                                         | 9/483     | 0.000345 |
| GO:0033549 | MAP kinase phosphatase activity                                                                                     | 4/483     | 0.000456 |
| GO:0019208 | Phosphatase regulator activity                                                                                      | 9/483     | 0.000894 |

GO, Gene Ontology; MAP, mitogen-activated protein; circ, circular RNA; hsa, Homo sapiens.
